# Supplementary material
Source: PubMed Central journal article supplement (PMC4406393)
Supplement: TOG-7-2015-001-s001.pdf [file TOG-7-2015-001-s001.pdf]

Hover et al, Supplementary Table 1

| <b>BMP Ligands</b> | <b>Receptors</b> | <b>Co-Receptors</b> | <b>Intracellular Mediators</b> | <b>Modulators</b> | <b>Modulators (con't)</b> | <b>IDs</b> | <b>TGFB ligands</b> | <b>Activin</b> | <b>GDFs</b>  | <b>Misc</b> |
|--------------------|------------------|---------------------|--------------------------------|-------------------|---------------------------|------------|---------------------|----------------|--------------|-------------|
| <i>BMP2</i>        | <i>ACVR1</i>     | <i>BAMBI</i>        | <i>SMAD1</i>                   | <i>AMN</i>        | <i>NBL1</i>               | <i>ID1</i> | <i>TGF 1</i>        | <i>AMH</i>     | <i>GDF1</i>  | <i>ARTN</i> |
| <i>BMP3</i>        | <i>ACVR1B</i>    | <i>BMPER</i>        | <i>SMAD2</i>                   | <i>CER1</i>       | <i>NOG</i>                | <i>ID2</i> | <i>TGF 2</i>        | <i>GDNF</i>    | <i>GDF3</i>  | <i>BMP1</i> |
| <i>BMP4</i>        | <i>ACVR1C</i>    | <i>TGFBR3</i>       | <i>SMAD3</i>                   | <i>CHRD</i>       | <i>SOST</i>               | <i>ID3</i> | <i>TGF 3</i>        | <i>INHBA</i>   | <i>GDF5</i>  | <i>HFE2</i> |
| <i>BMP5</i>        | <i>ACVR2A</i>    | <i>TMEFF1</i>       | <i>SMAD4</i>                   | <i>CHRDL1</i>     | <i>SOSTDC1</i>            | <i>ID4</i> |                     | <i>INHBB</i>   | <i>GDF6</i>  | <i>NEO1</i> |
| <i>BMP6</i>        | <i>ACVR2B</i>    | <i>TMEFF2</i>       | <i>SMAD5</i>                   | <i>CHRDL2</i>     | <i>TSKU</i>               |            |                     | <i>INHBC</i>   | <i>GDF7</i>  | <i>NRTN</i> |
| <i>BMP7</i>        | <i>ACVRL1</i>    |                     | <i>SMAD6</i>                   | <i>DAND5</i>      | <i>TWSG1</i>              |            |                     | <i>INHBE</i>   | <i>GDF9</i>  | <i>PSPN</i> |
| <i>BMP8B</i>       | <i>AMHR2</i>     |                     | <i>SMAD7</i>                   | <i>ENG</i>        | <i>USP9X</i>              |            |                     | <i>LEFTY1</i>  | <i>GDF11</i> | <i>RGMA</i> |
| <i>BMP10</i>       | <i>BMPR1A</i>    |                     | <i>SMAD9</i>                   | <i>FST</i>        | <i>VWC2</i>               |            |                     | <i>LEFTY2</i>  | <i>GDF15</i> | <i>RGMB</i> |
| <i>BMP15</i>       | <i>BMPR1B</i>    |                     | <i>SMURF1</i>                  | <i>FSTL1</i>      |                           |            |                     | <i>NODAL</i>   | <i>MSTN</i>  |             |
| <i>GDF2</i>        | <i>BMPR2</i>     |                     | <i>SMURF2</i>                  | <i>FSTL3</i>      |                           |            |                     |                |              |             |
|                    | <i>TGF R1</i>    |                     |                                | <i>GREM1</i>      |                           |            |                     |                |              |             |
|                    | <i>TGF R2</i>    |                     |                                | <i>GREM2</i>      |                           |            |                     |                |              |             |

Supplementary Table 1: List of 90 genes related to TGF family that was analyzed at the genomic level. Genes were analyzed at the mRNA level for both alterations and any associations with survival in GBM patients.
